# Supplementary material
Source: PubMed Central journal article supplement (PMC5482085)

SUPPLEMENTARY DATA

**Supplementary Figure 1. GFP fluorescence of INS-1 cells transiently transfected with dominant and recessive *WFS1* mutants.** INS1 823/13 cells were transfected with GFP-tagged empty vector (pEGFP-N1), wild-type *WFS1* (WT), mutant c.937C>T p.His313Tyr *WFS1* (p.H313Y), mutant c.2425G>A p.Glu809Lys *WFS1* (p.E809K), mutant c.2489A>C p.Glu830Ala *WFS1* (p.E830A), or mutant c.2341C>T p.Pro724Leu *WFS1* (p.P724L) expression plasmids. Representative fluorescence (left), DAPI (middle) and merged (right) images of INS1 832/13 cells expressing *WFS1* mutants are shown n=4; magnification is 40X.

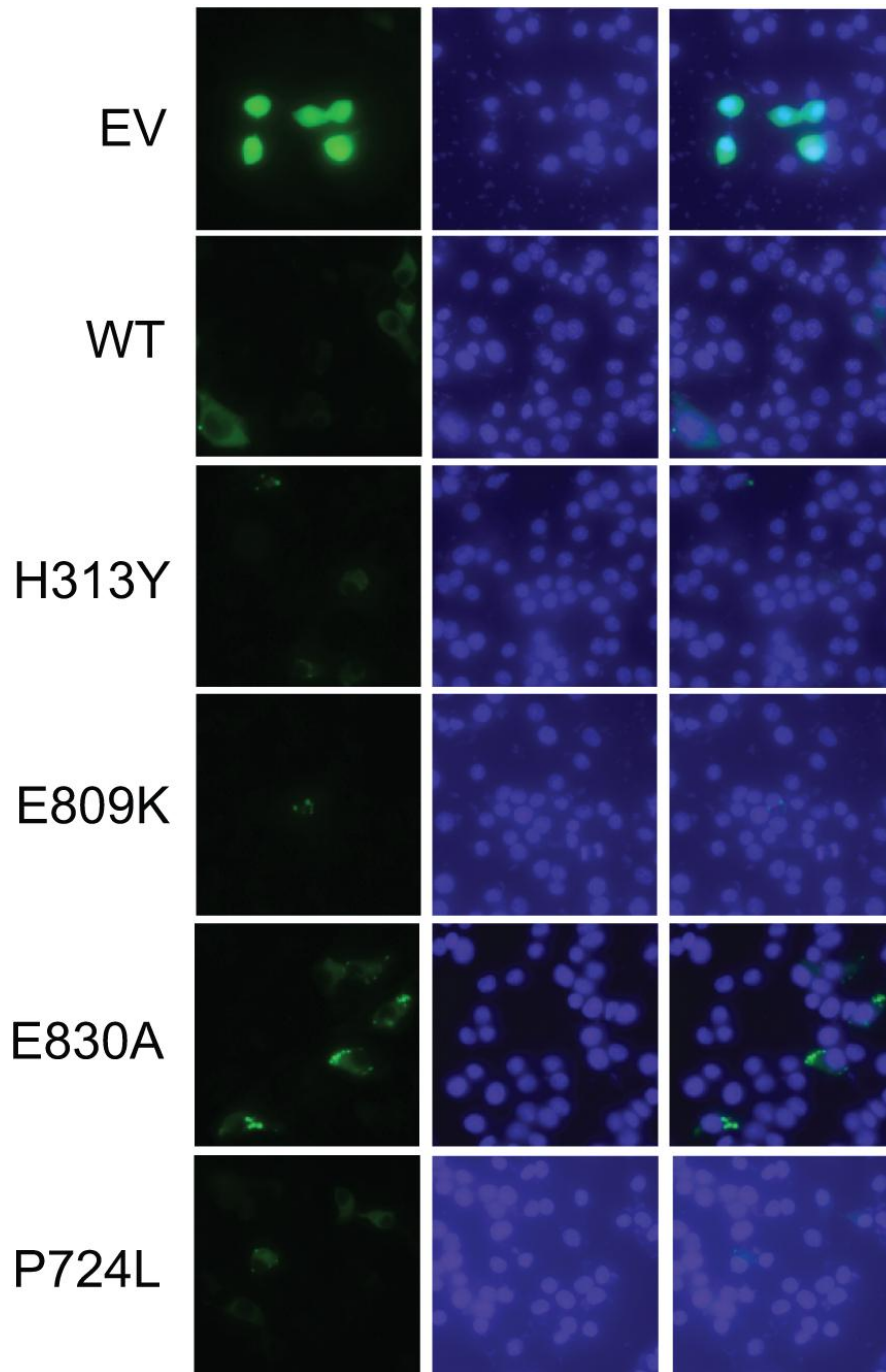

Supplement: DB161296SupplementaryData.pdf [file DB161296SupplementaryData.pdf]
